# Supplementary material for: PLOD Family: A Novel Biomarker for Prognosis and Personalized Treatment in Soft Tissue Sarcoma
Source: Genes (Basel). 2022 Apr 28;13(5):787. doi: 10.3390/genes13050787 (PMC9141206; doi:10.3390/genes13050787)
Supplement: Supplementary file 1 [file genes-13-00787-s001.zip › Supplementary Table S1.xlsx]

## Sheet: Sheet1
Supplementary Table S1
PLODs-correlated gene
Gene Symbol
PLOD2
SDF4
IQGAP1
SYDE1
SERPINH1
PDIA4
FNDC3B
SLC30A7
DDOST
AK2
OSTC
TXLNA
LAMC1
SLC39A1
TMEM214
RER1
KDELR1
CLIC1
MRC2
PYGL
CCDC109B
ANXA2
COLGALT1
PDIA3
PLOD3
NUCB1
SH3GLB1
TMED9
RBMS1
TUBA1C
RIPK1
SELENOF
RPN2
BCL2L12
CD276
PDPN
IKBIP
TAGLN2
SEC24D
CALU
P3H1
CAPZA1
GNG5
VASP
FAM114A1
CASP6
CHPF2
SEPN1
GPX7
P4HB
MMP14
ECE1
ANXA2P2
TMEM50A
SP140L
PIGT
MSN
SPATS2L
MYL12A
HDAC1
CD58
MGAT4B
CTSA
GSTK1
EDEM2
CEP89
PDIA6
FRMD8
ZDHHC12
ELK3
GUSB
OSMR
FLNA
COL5A2
FKBP9
NUDT19
WDR1
FAM46A
ZNF217
BCL10
REST
PFN1
DAP
LOXL3
HDAC7
CALD1
MUL1
KDELR2
TMEM8A
CD164
FUCA2
RHOC
TRAM1
HSP90B1
FHL3
PHTF1
MAGOH
LATS2
EHD2
FAM109B
PLOD1
COLGALT2
FAM107B
P4HA1
GEMIN5
CDCA3
EGLN3
HNRNPH2
P4HA2
P3H3
AL445524.2
FBXO6
OGFOD3
EGLN2
POR
FKBP10
RNF123
