# Supplementary figures and images for: PLOD Family: A Novel Biomarker for Prognosis and Personalized Treatment in Soft Tissue Sarcoma
Source: MDPI journal article supplement (doi:10.3390/genes13050787), 2022-04-28

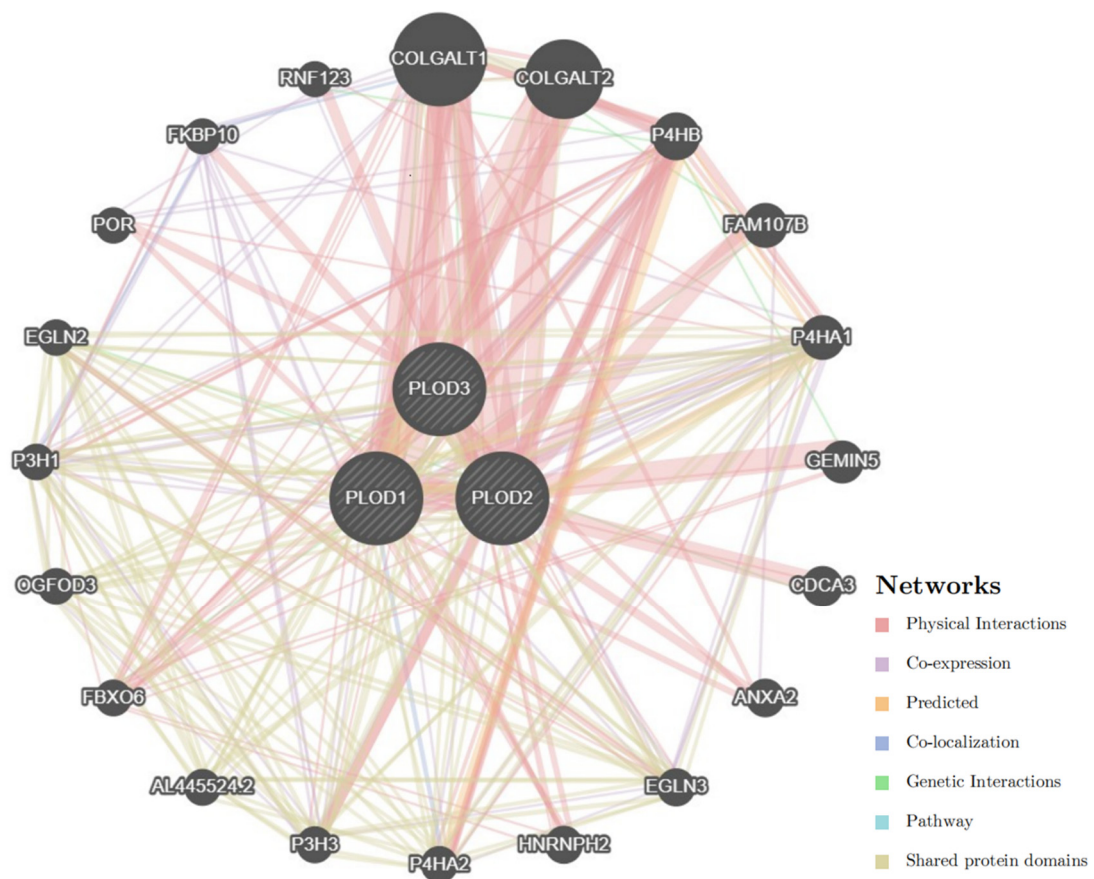

**Figure S1.** Gene-gene interaction network among PLOD family members. Each node represents a gene.

Supplement: s1 [file s1]
